# Supplementary material for: Cytotoxic, Anti-Proliferative and Apoptosis Activity of l-Amino Acid Oxidase from Malaysian Cryptelytrops purpureomaculatus (CP-LAAO) Venom on Human Colon Cancer Cells
Source: PubMed Central journal article supplement (PMC6100610; doi:10.3390/molecules23061388), 2018-06-08
Supplement: molecules-23-01388-s001.pdf [file molecules-23-01388-s001.pdf]

## Supplementary File

Table S1. LC-MS/MS results of purified CP-LAAO.

| Accession                 | -10lgP | Coverage (%) | #Peptides | #Unique | Avg. Mass | Description                                                           |
|---------------------------|--------|--------------|-----------|---------|-----------|-----------------------------------------------------------------------|
| A0A024BTN9 <br>OXLA_BOTSC | 252.91 | 24           | 11        | 2       | 56376     | L-amino acid oxidase Bs29 (Fragment)<br><i>Bothriechis schlegelii</i> |
| P81382 <br>OXLA_CALRH     | 221.31 | 35           | 11        | 4       | 58221     | L-amino-acid oxidase<br><i>Calloselasma rhodostoma</i>                |
| P0DI84 <br>OXLA_VIPAA     | 215.1  | 21           | 10        | 3       | 54748     | L-amino-acid oxidase<br><i>Vipera ammodytes ammodytes</i>             |
| Q6WP39 <br>OXLA_TRIST     | 200.14 | 25           | 10        | 2       | 58601     | L-amino-acid oxidase<br><i>Trimeresurus stejnegeri</i>                |
| X2JCV5 <br>OXLA_CERCE     | 141.97 | 16           | 9         | 2       | 58557     | L-amino acid oxidase<br><i>Cerastes cerastes</i>                      |

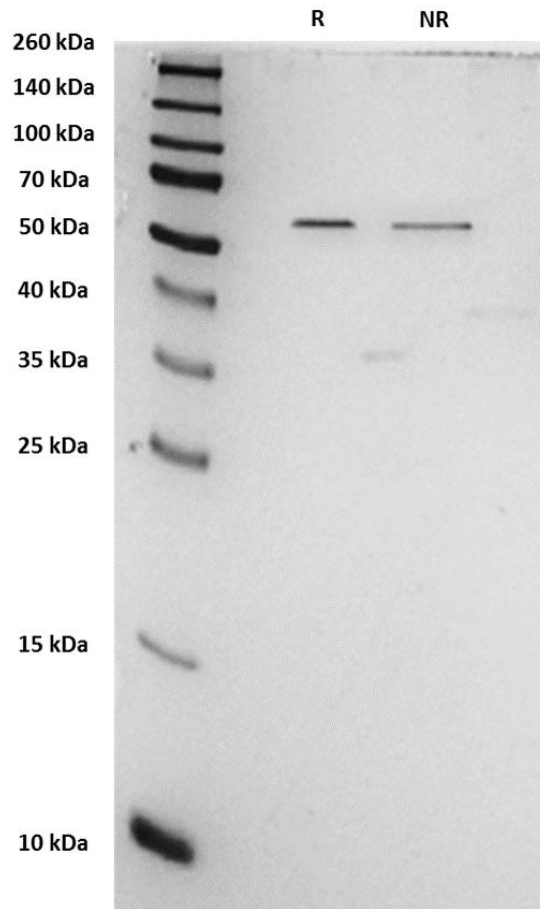

Figure S1. SDS-PAGE of purified L-amino acid oxidase (reduced (R) and non-reduced (NR)) aligned with Pierce Broad Range Spectra Multicolour protein ladder (E)

**Table S2** Partial peptide sequences of CP-LAAO identified from LC-MS/MS and *de novo* sequencing

| Protein Accession     | Peptide                                                | Unique | -10lgP | Mass     | Length | ppm  | m/z      | z | RT    |
|-----------------------|--------------------------------------------------------|--------|--------|----------|--------|------|----------|---|-------|
| P81382 OXLA_CALRH     | MNVFFMFSLFLAALGSC(+57.02)ADDR.N                        | N      | 27.62  | 2524.195 | 22     | -42  | 632.0296 | 4 | 4.62  |
| Q6WP39 OXLA_TRIST     | MNVFFMFSLFLAALGSC(+57.02)ADDR.N                        | N      | 27.62  | 2524.195 | 22     | -42  | 632.0296 | 4 | 4.62  |
| Q6WP39 OXLA_TRIST     | A.DDRNPLEEC(+57.02)FR.E                                | N      | 64.97  | 1449.631 | 11     | 1.9  | 484.2184 | 3 | 8.02  |
| Q6WP39 OXLA_TRIST     | A.DDRNPLEEC(+57.02)FRET DYEEFLEIAR.N                   | N      | 83.83  | 2945.314 | 23     | -0.5 | 737.3353 | 4 | 12.89 |
| P0DI84 OXLA_VIPAA     | K.TS(+79.97)NPKHVVVVGAGMS(+79.97).G                    | Y      | 19.82  | 1641.699 | 15     | 46.6 | 411.4511 | 4 | 5.11  |
| A0A024BTN9 OXLA_BOTSC | K.HVVIVGAGMSGLSAAAYVLGAGHQVTVLEASER.A                  | Y      | 125.43 | 3248.698 | 33     | -5.3 | 813.1774 | 4 | 13.32 |
| A0A024BTN9 OXLA_BOTSC | G.LSAAAYVLGAGHQVTVLEASER.A                             | N      | 51.43  | 2241.175 | 22     | -1.8 | 748.0644 | 3 | 11.36 |
| A0A024BTN9 OXLA_BOTSC | K.HVVVR( <b>sub I</b> )YGAGMSGLSAAAYVLGAGHQVTVLEASER.A | Y      | 34.74  | 3291.715 | 33     | -9.1 | 823.9285 | 4 | 12.65 |
| P81382 OXLA_CALRH     | K.HVVIVGAGMAGLSAAAYVLGAGHQVTVLEASERPGGR.V              | Y      | 38.6   | 3599.899 | 37     | -3.2 | 720.9849 | 5 | 13.49 |
| A0A024BTN9 OXLA_BOTSC | K.EGWY(-18.01)ANLGPMR(+14.02).L                        | N      | 16.65  | 1288.602 | 11     | 33.1 | 645.3298 | 2 | 12.18 |
| P0DI84 OXLA_VIPAA     | K.EGWY(-18.01)ANLGPMR(+14.02).I                        | N      | 16.65  | 1288.602 | 11     | 33.1 | 645.3298 | 2 | 12.18 |
| P0DI84 OXLA_VIPAA     | R.KFGLNLFNEFSQENDNAWYFIK.N                             | Y      | 16.84  | 2576.233 | 21     | -2.7 | 645.0639 | 4 | 24.93 |
| P81382 OXLA_CALRH     | K.DPGLLKYPVKPSEAGKSAGQLYEESLGK.V                       | Y      | 18.84  | 2960.549 | 28     | 58.3 | 741.1877 | 4 | 21.45 |
| Q6WP39 OXLA_TRIST     | R.FDEIVDGMMDK(+27.99)LPTSMYR.A                         | Y      | 16.01  | 2043.928 | 17     | 5    | 682.3201 | 3 | 8.6   |
| A0A024BTN9 OXLA_BOTSC | K.LPTSMYQAI.E                                          | N      | 16.34  | 1022.511 | 9      | 6.1  | 512.2657 | 2 | 9.61  |
| X2JCV5 OXLA_CERCE     | K.LPTSMYQAI.Q                                          | N      | 16.34  | 1022.511 | 9      | 6.1  | 512.2657 | 2 | 9.61  |
| X2JCV5 OXLA_CERCE     | E.VTVTYQTPAK.N                                         | Y      | 50.75  | 1106.597 | 10     | -0.7 | 554.3055 | 2 | 5.87  |
| X2JCV5 OXLA_CERCE     | K.K( <b>sub E</b> )VTVTYQTPAK.N                        | Y      | 22.86  | 1234.692 | 11     | -3.1 | 618.3514 | 2 | 5.42  |
| A0A024BTN9 OXLA_BOTSC | K.IFLTC(+57.02)TK.K                                    | N      | 53.04  | 881.4681 | 7      | 0.5  | 441.7415 | 2 | 7.18  |
| Q6WP39 OXLA_TRIST     | K.IFLTC(+57.02)TK.K                                    | N      | 53.04  | 881.4681 | 7      | 0.5  | 441.7415 | 2 | 7.18  |
| X2JCV5 OXLA_CERCE     | K.IFLTC(+57.02)TK.K                                    | N      | 53.04  | 881.4681 | 7      | 0.5  | 441.7415 | 2 | 7.18  |
| A0A024BTN9 OXLA_BOTSC | K.FWEDDGIHGK.S                                         | N      | 64.75  | 1259.557 | 11     | 1.5  | 420.8603 | 3 | 6.71  |
| P81382 OXLA_CALRH     | K.FWEDDGIHGK.S                                         | N      | 64.75  | 1259.557 | 11     | 1.5  | 420.8603 | 3 | 6.71  |
| P0DI84 OXLA_VIPAA     | K.FWEDDGIHGK.S                                         | N      | 64.75  | 1259.557 | 11     | 1.5  | 420.8603 | 3 | 6.71  |
| X2JCV5 OXLA_CERCE     | K.FWEDDGIHGK.S                                         | N      | 64.75  | 1259.557 | 11     | 1.5  | 420.8603 | 3 | 6.71  |
| Q6WP39 OXLA_TRIST     | R.EDEGIHGKSTTDLPSR.F                                   | N      | 17.69  | 1797.849 | 17     | -0.3 | 450.4695 | 4 | 4.36  |

|                       |                                                   |   |       |          |    |      |          |   |       |
|-----------------------|---------------------------------------------------|---|-------|----------|----|------|----------|---|-------|
| P81382 OXLA_CALRH     | G.VIIAYGIGDDANFFQALDFKDC(+57.02)ADIVFNDLSLIHQPK.K | Y | 34.59 | 4295.161 | 38 | -8.9 | 1074.788 | 4 | 17.15 |
| P0DI84 OXLA_VIPAA     | K.EEIP(sub Q)SFC(+57.02)YPSMIQK.W                 | Y | 34.52 | 1727.79  | 14 | 25.3 | 576.9518 | 3 | 8.9   |
| A0A024BTN9 OXLA_BOTSC | G.ITTFIPYQFQHFSEA.L                               | N | 23.41 | 1815.847 | 15 | -3.1 | 908.9279 | 2 | 10.85 |
| Q6WP39 OXLA_TRIST     | G.ITTFIPYQFQHFSEA.L                               | N | 23.41 | 1815.847 | 15 | -3.1 | 908.9279 | 2 | 10.85 |
| X2JCV5 OXLA_CERCE     | G.ITTFIPYQFQHFSEA.L                               | N | 23.41 | 1815.847 | 15 | -3.1 | 908.9279 | 2 | 10.85 |
| P81382 OXLA_CALRH     | R.IYFAGEYTAQAHGWIDSTIK.S                          | N | 19.99 | 2270.101 | 20 | -5.9 | 757.7031 | 3 | 27.83 |
| X2JCV5 OXLA_CERCE     | R.IYFAGEYTAQAHGWIDSTIK.S                          | N | 19.99 | 2270.101 | 20 | -5.9 | 757.7031 | 3 | 27.83 |

1 MNVFFMFSLL FLAALGSCAD DRNPLEECFR ETDYEEFLEI ARxxxxxTSNP KHVVRVVGAGM SGLSAAYVLA GAGHQVTVLE  
 81 ASERPGGRxx xxxxxxEGWY ANLGPMRxxx xxxxxxxxxxxx KFGNLNLEFS QENDNAWYFI Kxxxxxxxxx xDPGLLKYPV  
 161 KPSEAGKSAG QLYEESLGKx xxxxxxxxxxxx xxxxxxxxxxxx xxxxxxxxxxxx xxxxxxxxxxxx xxxxxxxxxxxx xxxxxxxxxxxx  
 241 xxxxxxxxFD EIVDGMKLP TSMYQAixxx xxxxxxxxxxxx xxxxxKVTV TYQTPAKxxx xxxxxxxxxxxx xxxxxxxxxxxx  
 321 xxxxxxxxxxxx xxxxxxxxxxxx xxxifLTCTK KFWEDDGIHG GKSTTDLPSR xxxxxxxxxxxx xxxvIIAYG IGD DANFFQA  
 401 LDFKDCADIV FNDLSLIHQL PKEEIPSFY PSMIQKxxxx xxxxxxITTF FTPYQFQHFS EAxxxxxxxxI YFAGEYTAQA  
 481 HGWIDSTIKx xxxxxxxxxxxx xxxxxxxxxxxx xxxxxxxxxxxx

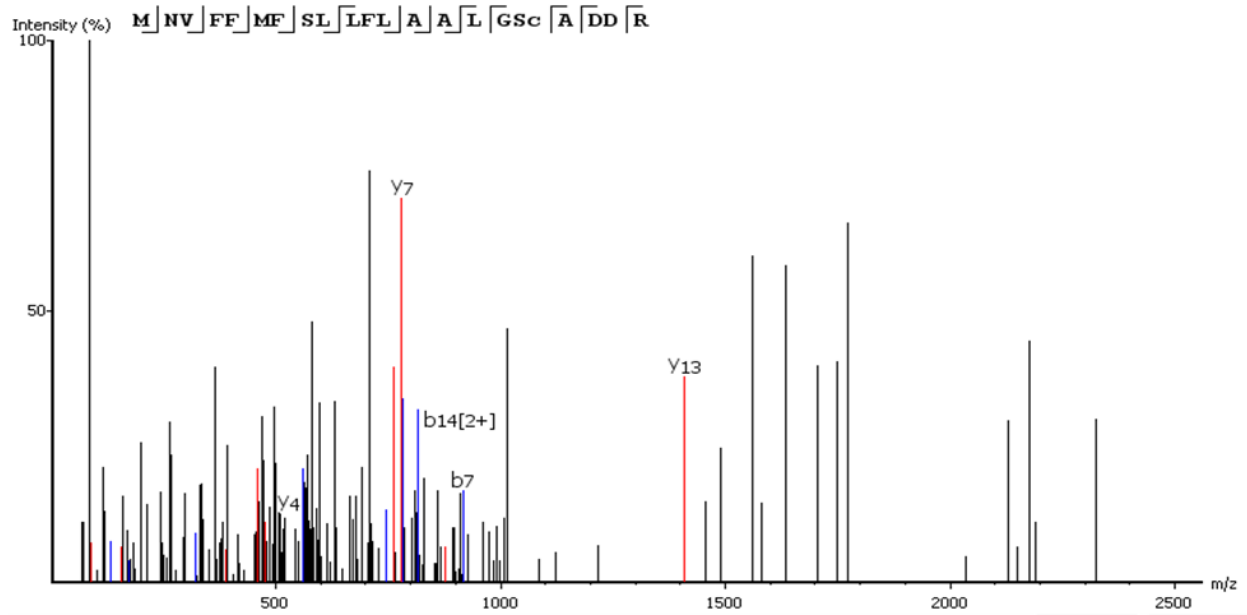

**Figure S2.** Partial amino acid sequence of *C. purpureomaculatus* LAAO identified from LC-MS/MS (Top panel). Highlighted amino acid (red) represents mutation in the peptide sequence compared to similar proteins from other snake species. Mass to charge ratio (M/Z) of high confidence peptide match obtained from LC-MS/MS for *C. purpureomaculatus* LAAO (bottom panel).
